# Supplementary material for: Lone Pair…π Contacts and Structure Signatures of r(UNCG) Tetraloops, Z-Turns, and Z-Steps: A WebFR3D Survey
Source: Molecules. 2022 Jul 7;27(14):4365. doi: 10.3390/molecules27144365 (PMC9323530; doi:10.3390/molecules27144365)
Supplement: Supplementary file 1 [file molecules-27-04365-s001.zip › molecules-1758873-supplementary.pdf]

## Supplementary Material

### Lone pair... $\pi$ contacts and structure signatures of r(UNCG) tetraloops, Z-turns and Z-steps: A WebFR3D survey

Craig L. Zirbel<sup>1</sup> and Pascal Auffinger<sup>2\*</sup>

<sup>1</sup>. Department of Mathematics and Statistics, Bowling Green State University, Bowling Green, OH 43403, USA;

<sup>2</sup>. Architecture et Réactivité de l'ARN, UPR 9002, Université de Strasbourg, Institut de Biologie Moléculaire et Cellulaire du CNRS, 67084 Strasbourg, France;

Tel: +33 388417049; Fax: +33 388602218;

Email: p.auffinger@ibmc-cnrs.unistra.fr;

#### Contents:

---

**Figure S1:** A WebFR3D symbolic query for finding all lp... $\pi$  contacts.

**Figure S2:** A WebFR3D symbolic query for finding NpN Z-steps.

**Figure S3:** A strict symbolic query for refining Z-turn searches with a 2.0 Å resolution limit.

**Figure S4:** WebFR3D finds GNNA Z-turns.

**Figure S5:** WebFR3D finds Z<sub>anti</sub>-turns that fold similarly to Z-turns.

**Figure S6:** WebFR3D hits as visualized over the four nucleobases with a sO search at 3.0 Å resolution.

#### References

---

## FR3D search page

1. Describe the motif you are looking for, using (a), (b), or both.

a. For a purely symbolic search, specify the number of positions in the motif.

b. If you have a set of nucleotides that form the motif, and you want to search for other instances according to the geometry of the motif, fill in the next two boxes.

Unit IDs, separated by commas:

Maximum geometric discrepancy:

[View query](#)

2. To add symbolic constraints, click the Interaction Matrix button: [Interaction Matrix](#)

|           | Position1 | Position2 |
|-----------|-----------|-----------|
| Position1 | N         | sO        |
| Position2 |           | N         |

3. What structures should be searched? Use (a), (b), or both.

a. List individual structures (like 6ZMI) or chains (like 6ZMI11L5), separated by commas:

b. Specify a [representative set](#) to search by typing the release number:  and the resolution cutoff:

4. Give your search a name (optional, only ASCII characters):

5. Email address for persistent link to results (optional):

6. When you are ready to launch the search, click the Search button:

Clear the entire form to start again:

[Help](#)

Click an element to view help

## FR3D output

Query name: Symbolic query for finding all lone pair...pi contacts in the 7K00 structure. Found 246 candidates from 1 of 1 files in 6 seconds. [See and modify query](#) | [See CSV output](#)

Columns of the table show candidate number in similarity order, checkbox to display coordinates or not, structure resolution, discrepancy from query in geometric or mixed searches, units matching each position in the query, sequence of the units and backbone connectivity, glycosidic bond conformation if requested, pair and stack interactions present, base-phosphate interactions, base-ribose interactions, oxygen stacking interactions, and the number of nested AU, GC, GU Watson-Crick pairs crossed by each annotated interaction.

| S.  | Show                                | Res. | Å | Position 1    | Position 2    | Sequence | 1-2  | 1-2 | 2-1 | 1-2  | 2-1 | 1-2   | 2-1 | Crossing 1-2 |
|-----|-------------------------------------|------|---|---------------|---------------|----------|------|-----|-----|------|-----|-------|-----|--------------|
| 1.  | <input type="checkbox"/>            | 1.98 |   | 7K0011aIA959  | 7K0011aIU957  | A-U      | tHS  |     |     |      |     | sOP23 |     | 0            |
| 2.  | <input type="checkbox"/>            | 1.98 |   | 7K0011aIA1393 | 7K0011aIU1391 | A-U      | tHS  |     |     |      |     | sOP23 |     | 0            |
| 3.  | <input type="checkbox"/>            | 1.98 |   | 7K0011aIA2565 | 7K0011aIU2563 | A-U      | tHS  |     |     |      |     | sOP23 |     | 0            |
| 4.  | <input type="checkbox"/>            | 1.98 |   | 7K0011aIA1953 | 7K0011aIU1951 | A-U      | tHS  |     |     |      |     | sOP23 |     | 0            |
| 5.  | <input type="checkbox"/>            | 1.98 |   | 7K0011aIG570  | 7K0011aIU568  | G-U      |      |     |     |      |     | sOP23 |     | 0            |
| 6.  | <input checked="" type="checkbox"/> | 1.98 |   | 7K0011aIA1928 | 7K0011aIU1926 | A-U      | tHS  |     |     |      |     | sOP23 |     | 0            |
| 7.  | <input type="checkbox"/>            | 1.98 |   | 7K0011aIA1673 | 7K0011aIU1671 | G-U      |      |     |     |      |     | sOP23 |     | 0            |
| 8.  | <input type="checkbox"/>            | 1.98 |   | 7K0011aIA1093 | 7K0011aIU1091 | A-U      | tHS  |     |     |      |     | sOP23 |     | 0            |
| 9.  | <input type="checkbox"/>            | 1.98 |   | 7K0011aIA263  | 7K0011aIU261  | A-U      | ntHS |     |     | n7BR |     | sOP23 |     | 0            |
| 10. | <input type="checkbox"/>            | 1.98 |   | 7K0011aIG791  | 7K0011aIU789  | G-U      |      |     |     |      |     | sOP23 |     | 0            |
| 11. | <input type="checkbox"/>            | 1.98 |   | 7K0011aIG1633 | 7K0011aIG1631 | G-G      | s33  |     |     |      |     | sOP23 |     | 0            |

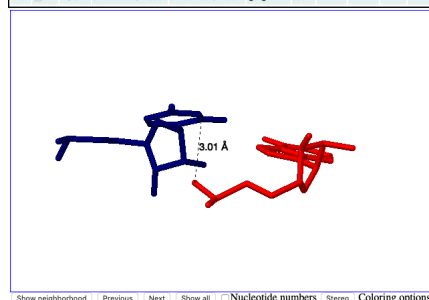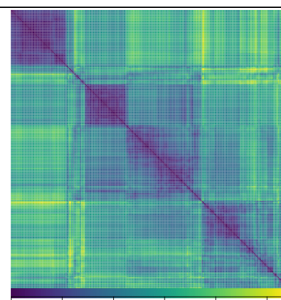

**Figure S1: A WebFR3D symbolic query for finding all lp... $\pi$  contacts.** (Top) The search panel using the text string "sO" retrieves all instances of a stacking of a backbone oxygen atom (OP1, OP2, O2', O3', O4', and O5') from nt1 with a nucleobase of nt2. The string "sO" expands to "sO3 sO5" which expands to include all backbone oxygens. (Bottom) Partial view of the WebFR3D result panel showing a sOP23 contact (OP2 atom stacking with the 3'-face of a uridine) present in the 7K00 *Escherichia coli* 70S cryo-EM structure [1]. The shortest lp... $\pi$  contact visualized by a dashed line involves the (U)C2 atom. Note that 246 potential lp... $\pi$  contacts are identified in 7K00. Use the following link to retrieve the results of this search:

<http://rna.bgsu.edu/webfr3d/Results/6287e7c307b40/6287e7c307b40.html>

(last accessed the 6<sup>th</sup> of July 2022)

## FR3D search page

1. Describe the motif you are looking for, using (a), (b), or both.

a. For a purely symbolic search, specify the number of positions in the motif.

b. If you have a set of nucleotides that form the motif, and you want to search for other instances according to the geometry of the motif, fill in the next two boxes.

Unit IDs, separated by commas:

Maximum geometric discrepancy:

[View query](#)

2. To add symbolic constraints, click the Interaction Matrix button: [Interaction Matrix](#)

|           | Position1 | Position2 |
|-----------|-----------|-----------|
| Position1 | N anti    | sO4'3     |
| Position2 | next      | N syn     |

3. What structures should be searched? Use (a), (b), or both.

a. List individual structures (like 6ZMI) or chains (like 6ZMI||L5), separated by commas: 7k00

b. Specify a [representative set](#) to search by typing the release number: and the resolution cutoff:

4. Give your search a name (optional, only ASCII characters): Symbolic query for finding all Z-steps in the 7k00 structure

5. Email address for persistent link to results (optional):

6. When you are ready to launch the search, click the Search button: [Search](#)

Clear the entire form to start again: [Reset](#)

[Help](#)

Click an element to view help

## FR3D output

Query name: Symbolic query for finding all Z-steps in the 7k00 structure. Found 11 candidates from 1 of 1 files in 2 seconds. [See and modify query](#) | [See CSV output](#)  
Columns of the table show candidate number, radio button to display coordinates or not, discrepancy from query in geometric or mixed searches, units in each position of the motif, pair and stack interactions, base-phosphate interactions, base-ribose interactions, and crossing number for each interaction.

| S   | Show                                | Res  | A | Position 1     | Position 2     | Sequence | Orient | 1   | Orient | 2  | Chi  | 1    | Chi | 2 | 1-2 |
|-----|-------------------------------------|------|---|----------------|----------------|----------|--------|-----|--------|----|------|------|-----|---|-----|
| 1.  | <input type="checkbox"/>            | 1.98 |   | 7K001 laA12266 | 7K001 laA12267 | A-A      | anti   | syn | -136   | 70 | ns53 | sO43 |     |   |     |
| 2.  | <input checked="" type="checkbox"/> | 1.98 |   | 7K001 laG721   | 7K001 laG722   | G-G      | anti   | syn | -146   | 63 | s53  | sO43 |     |   |     |
| 3.  | <input type="checkbox"/>            | 1.98 |   | 7K001 laA1020  | 7K001 laA1021  | A-A      | anti   | syn | -133   | 79 | s53  | sO43 |     |   |     |
| 4.  | <input type="checkbox"/>            | 1.98 |   | 7K001 laC527   | 7K001 laA528   | C-A      | anti   | syn | -145   | 71 | s53  | sO43 |     |   |     |
| 5.  | <input type="checkbox"/>            | 1.98 |   | 7K001 laU982   | 7K001 laA983   | U-A      | anti   | syn | -136   | 72 | s53  | sO43 |     |   |     |
| 6.  | <input type="checkbox"/>            | 1.98 |   | 7K001 laU932   | 7K001 laA933   | U-A      | anti   | syn | -140   | 83 | s53  | sO43 |     |   |     |
| 7.  | <input type="checkbox"/>            | 1.98 |   | 7K001 laG2307  | 7K001 laG2308  | G-G      | anti   | syn | -126   | 75 | s53  | sO43 |     |   |     |
| 8.  | <input type="checkbox"/>            | 1.98 |   | 7K001 laC345   | 7K001 laG346   | C-G      | anti   | syn | -119   | 69 | s53  | sO43 |     |   |     |
| 9.  | <input type="checkbox"/>            | 1.98 |   | 7K001 laC1694  | 7K001 laG1695  | C-G      | anti   | syn | -132   | 57 | s53  | sO43 |     |   |     |
| 10. | <input type="checkbox"/>            | 1.98 |   | 7K001 laC1451  | 7K001 laG1452  | C-G      | anti   | syn | -108   | 64 | s53  | sO43 |     |   |     |
| 11. | <input type="checkbox"/>            | 1.98 |   | 7K001 laU1141  | 7K001 laA1142  | U-A      | anti   | syn | -104   | 74 | s53  | sO43 |     |   |     |

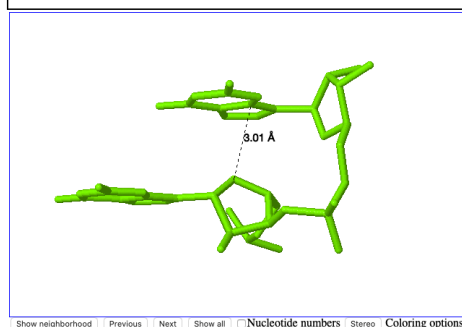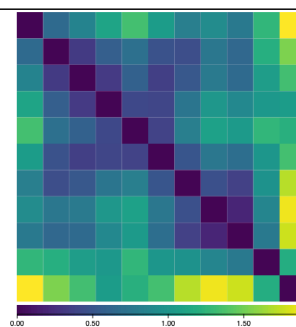

**Figure S2: A WebFR3D symbolic query for finding NpN Z-steps.** (Top) The search panel using the text string (sO4'3) indicates that all instances of a stacking of a O4' atom with the 3'-face of a nucleobase will be retrieved. To gather Z-steps, it is also necessary to specify that the nucleotides are consecutive ("next" condition), that the O4' ribose of the 5'-nt stacks with the 3'-face of the 3'-nt that is in *syn*. In a few instances, the 3'-nt can also be *anti*. When this constraint is given the search retrieves Z<sub>anti</sub>-steps [2]. (Bottom) Partial view of the WebFR3D result panel showing a GpG Z-step in the 7K00 structure (note the head-to-head orientation of the riboses; see also Figure 3b). The lp... $\pi$  shortest contact distance that is visualized by a dashed line involves the (G)C4 atom. Note that eleven potential NpN Z-steps are identified in the 7K00 *Escherichia coli* 70S structure. Use the following link to retrieve the results of this search:

<http://rna.bgsu.edu/webfr3d/Results/627e8a7b5856f/627e8a7b5856f.html>

(last accessed the 6<sup>th</sup> of July 2022)

## FR3D search page

1. Describe the motif you are looking for, using (a), (b), or both.

a. For a purely symbolic search, specify the number of positions in the motif.

b. If you have a set of nucleotides that form the motif, and you want to search for other instances according to the geometry of the motif, fill in the next two boxes.

Unit IDs, separated by commas:

Maximum geometric discrepancy:

2. To add symbolic constraints, click the Interaction Matrix button:

|           | Position1 | Position2 | Position3 | Position4 | Position5 | Position6 |
|-----------|-----------|-----------|-----------|-----------|-----------|-----------|
| Position1 | N         |           |           |           |           |           |
| Position2 | next      | U         |           |           | tSW       |           |
| Position3 |           | next      | N anti    |           |           |           |
| Position4 |           |           | next      | N anti    | sO4'3     |           |
| Position5 |           |           |           | next      | G         |           |
| Position6 |           |           |           |           | next      | N         |

3. What structures should be searched? Use (a), (b), or both.

a. List individual structures (like 6ZMI) or chains (like 6ZMI1|LS), separated by commas:

b. Specify a **representative set** to search by typing the release number:  and the resolution cutoff:

4. Give your search a name (optional, only ASCII characters):

5. Email address for persistent link to results (optional):

6. When you are ready to launch the search, click the Search button:

Clear the entire form to start again:

**Help**

Click an element to view help

See and modify query | See CSV output

Columns of the table show candidate number in similarity order, checkbox to display coordinates or not, structure resolution, discrepancy from query in geometric or mixed searches, units matching each position in the query, sequence of the units and backbone connectivity, glycosidic bond conformation if requested, pair and stack interactions present, base-phosphate interactions, base-ribose interactions, oxygen stacking interactions, and the number of nested AU, GC, GU Watson-Crick pairs crossed by each annotated interaction.

| S. Show Res. Å |               |               |               |               |               |               |                  |         |         |         |         |         |       |       |       |       |       |       |     |     |     |     |     |     |     |      |      |      |     |      |       |       |
|----------------|---------------|---------------|---------------|---------------|---------------|---------------|------------------|---------|---------|---------|---------|---------|-------|-------|-------|-------|-------|-------|-----|-----|-----|-----|-----|-----|-----|------|------|------|-----|------|-------|-------|
| Position 1     | Position 2    | Position 3    | Position 4    | Position 5    | Position 6    | Sequence      | Conf. 1          | Conf. 2 | Conf. 3 | Conf. 4 | Conf. 5 | Conf. 6 | Chi 1 | Chi 2 | Chi 3 | Chi 4 | Chi 5 | Chi 6 | 1-2 | 1-6 | 2-4 | 2-5 | 2-6 | 4-5 | 5-6 | 4-3  | 3-2  | 5-2  | 6-2 | 4-5  |       |       |
| 1. 1.98        | 7K001IAIC342  | 7K001IAU1343  | 7K001IAIA344  | 7K001IAIC345  | 7K001IAIG346  | 7K001IAIG347  | C-U-A-C-G-G anti | anti    | anti    | anti    | syn     | anti    | -167  | -152  | -100  | -119  | 69    | -161  | s35 | cWW | s35 | ISW | s55 | s53 | s55 | 8BPb | n0BR | n5BR |     |      |       | sO4'3 |
| 2. 2.0         | 7K001IAIC1691 | 7K001IAU11692 | 7K001IAU11693 | 7K001IAIC1694 | 7K001IAIG1695 | 7K001IAIG1696 | C-U-U-C-G-G anti | anti    | anti    | anti    | syn     | anti    | -170  | -159  | -106  | -132  | 57    | -177  | s35 | cWW | s35 | ISW | s55 | s53 | s55 | 8BPb | n0BR |      |     |      | sO4'3 |       |
| 3. 2.0         | 5Y851IDIC28   | 5Y851IDU29    | 5Y851IDU30    | 5Y851IDIC31   | 5Y851IDIG32   | 5Y851IDIG33   | C-U-U-C-G-G anti | anti    | anti    | anti    | syn     | anti    | -162  | -157  | -128  | -139  | 61    | -171  | s35 | cWW | s35 | ISW | s55 | s53 | s55 | 8BPb |      |      |     |      | sO4'3 |       |
| 4. 1.5         | 7E0G1IAC119   | 7E0G1IAU120   | 7E0G1IAU121   | 7E0G1IAC122   | 7E0G1IAC123   | 7E0G1IAC124   | C-U-U-C-G-G anti | anti    | anti    | anti    | syn     | anti    | -167  | -155  | -131  | -144  | 56    | -173  | s35 | cWW | s35 | ISW | s55 | s53 | s55 | 8BPb |      |      |     | n3BR | sO4'3 |       |
| 5. 2.0         | 7KXV1IBG517   | 7KXV1IBU518   | 7KXV1IBU519   | 7KXV1IBG520   | 7KXV1IBG521   | 7KXV1IBG522   | C-U-U-C-G-G anti | anti    | anti    | anti    | syn     | anti    | -164  | -163  | -123  | -129  | 60    | -177  | s35 | cWW | s35 | ISW | s55 | s53 | s55 | 8BPb | n0BR |      |     |      | sO4'3 |       |
| 6. 2.0         | 3U4M1IBC2143  | 3U4M1IBU2144  | 3U4M1IBC2145  | 3U4M1IBC2146  | 3U4M1IBC2147  | 3U4M1IBC2148  | C-U-U-C-G-G anti | anti    | anti    | anti    | syn     | anti    | -166  | -158  | -114  | -132  | 50    | -171  | s35 | cWW | s35 | ISW | s55 | s53 | s55 | 8BPb | n0BR |      |     |      | sO4'3 |       |
| 7. 2.0         | 4ARC1IBG478A  | 4ARC1IBU478B  | 4ARC1IBU478C  | 4ARC1IBG478D  | 4ARC1IBG478E  | 4ARC1IBG478F  | G-U-U-C-G-G anti | anti    | anti    | anti    | syn     | anti    | -169  | -163  | -135  | -118  | 63    | -170  | s35 | cWW | s35 | ISW | s55 | s53 | s55 | 8BPb | n0BR |      |     |      | sO4'3 |       |

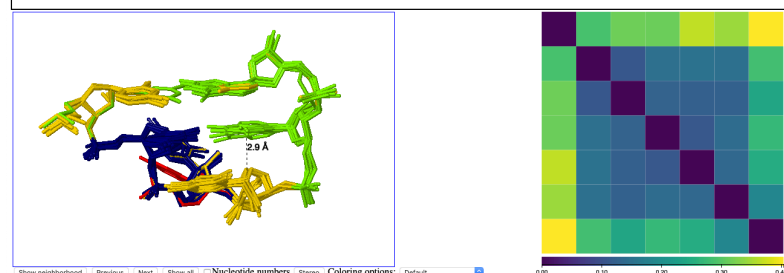

**Figure S3** A strict symbolic query for refining Z-turn searches with a 2.0 Å resolution limit. (Top) WebFR3D search page with more stringent search criteria than those used in **Figure 5**. (Bottom) Partial view of the WebFR3D result panel showing an overlay of seven structures. The 2.9 Å lp... $\pi$  contact shown in **Figure 5** for 3U4M is visualized by a dashed line. The rationales for applying more stringent search criteria are described next. By examining the result panel of **Figure 5**, we noted that four of the 14 turns do not display strict Z-step lp... $\pi$  contacts. Therefore, we added a nt4...nt5 sO4'3 constraint. This narrows the search down to ten hits. Two additional Z-turns display a s33 stacking between nt4 and nt5 instead of the more common r(UNNG) s53 stacking pattern. This reveals that the bottom nucleotide is in *syn* and not *anti*. By discarding these two structures through imposing an *anti*-conformation to the 3<sup>rd</sup> tetraloop residue, the structural ensemble comprises now eight elements. A further examination of the **Figure 5** data reveals that the 2<sup>nd</sup> residue of 6DCB is in “Intermediate *syn*” and as noted in **Section 3.4** of the main text, the local electron density associated with this tetraloop is of poor quality motivating the 6DCB exclusion from the set of structures. Use the following link to retrieve the results of this search:

<http://rna.bgsu.edu/webfr3d/Results/6287e67695a70/6287e67695a70.html>

(last accessed the 6<sup>th</sup> of July 2022)

## FR3D search page

1. Describe the motif you are looking for, using (a), (b), or both.

a. For a purely symbolic search, specify the number of positions in the motif.

b. If you have a set of nucleotides that form the motif, and you want to search for other instances according to the geometry of the motif, fill in the next two boxes.

Unit IDs, separated by commas:

[View query](#)

Maximum geometric discrepancy:

2. To add symbolic constraints, click the Interaction Matrix button:

|           | Position1 | Position2 | Position3 | Position4 | Position5 | Position6 |
|-----------|-----------|-----------|-----------|-----------|-----------|-----------|
| Position1 | N         |           |           |           |           |           |
| Position2 | next      | G         |           |           | tSW       |           |
| Position3 |           | next      | N anti    |           |           |           |
| Position4 |           |           | next      | N anti    | sO4'3     |           |
| Position5 |           |           |           | next      | A         |           |
| Position6 |           |           |           |           | next      | N         |

3. What structures should be searched? Use (a), (b), or both.

a. List individual structures (like 6ZMI) or chains (like 6ZMI11L5), separated by commas:

b. Specify a [representative set](#) to search by typing the release number:  and the resolution cutoff:

4. Give your search a name (optional, only ASCII characters):

5. Email address for persistent link to results (optional):

6. When you are ready to launch the search, click the Search button:

Clear the entire form to start again:

[Help](#)

Click an element to view help

## FR3D output

Query name: GNNA Z-turn motif strict query (resolution better or equal to 2.5 Angs.). Found 8 candidates from 933 files in 14 seconds. [See and modify query](#) | [See CSV output](#)

Columns of the table show candidate number, radio button to display coordinates or not, discrepancy from query in geometric or mixed searches, units in each position of the motif, pair and stack interactions, base-phosphate interactions, base-base interactions, and crossing number for each interaction.

| S  | Show | Res.           | A              | Position 1     | Position 2     | Position 3     | Position 4     | Position 5  | Position 6 | Sequence | Orient 1 | Orient 2 | Orient 3 | Orient 4 | Orient 5 | Orient 6 | Chi 1 | Chi 2 | Chi 3 | Chi 4 | Chi 5 | Chi 6 | 1-2 | 1-6 | 2-4 | 2-5   | 2-6  | 4-5   | 5-6   | 4-3 | 5-4  | 4-3 | 5-2   | 5-6 | 4-5 |  |
|----|------|----------------|----------------|----------------|----------------|----------------|----------------|-------------|------------|----------|----------|----------|----------|----------|----------|----------|-------|-------|-------|-------|-------|-------|-----|-----|-----|-------|------|-------|-------|-----|------|-----|-------|-----|-----|--|
| 1. | 2.2  | 70F011AAC1989  | 70F011IAC1990  | 70F011IAC1991  | 70F011IAC1992  | 70F011IAC1993  | 70F011IAC1994  | C-G-A-C-A-A | anti       | anti     | anti     | anti     | anti     | anti     | anti     | anti     | -163  | -160  | -142  | -128  | 102   | -172  | 635 | tSW | n53 | n7BPb | n7BR | n2BR  | sO4'3 |     |      |     |       |     |     |  |
| 2. | 2.4  | 4V9F10IC872    | 4V9F10IC873    | 4V9F10IC874    | 4V9F10IC875    | 4V9F10IC876    | 4V9F10IC877    | U-G-A-A-A-G | anti       | anti     | anti     | anti     | anti     | anti     | anti     | anti     | -161  | -158  | -144  | -117  | 98    | -155  | 635 | tSW | n53 | n7BR  | n2BR | sO4'3 |       |     |      |     |       |     |     |  |
| 3. | 2.1  | 4YBB10DAU779   | 4YBB10DAU780   | 4YBB10DAU781   | 4YBB10DAU782   | 4YBB10DAU783   | 4YBB10DAU784   | U-G-A-A-A-G | anti       | anti     | anti     | anti     | anti     | anti     | anti     | anti     | -166  | -158  | -143  | -108  | 98    | -156  | 635 | tSW | n53 | n7BR  | n2BR | sO4'3 |       |     |      |     |       |     |     |  |
| 4. | 2.5  | 6AZ3111C962    | 6AZ3111C963    | 6AZ3111C964    | 6AZ3111C965    | 6AZ3111C966    | 6AZ3111C967    | C-G-A-A-A-G | anti       | anti     | anti     | anti     | anti     | anti     | anti     | anti     | -166  | -158  | -149  | -122  | 102   | -161  | 635 | tSW | n53 | n7BPb | n2BR | sO4'3 |       |     |      |     |       |     |     |  |
| 5. | 2.3  | 6S0Z111A824    | 6S0Z111A825    | 6S0Z111A826    | 6S0Z111A827    | 6S0Z111A828    | 6S0Z111A829    | A-G-A-A-A-U | anti       | anti     | anti     | anti     | anti     | anti     | anti     | anti     | -163  | -160  | -150  | -116  | 97    | -152  | 635 | tSW | n53 | n7BR  | n2BR | sO4'3 |       |     |      |     |       |     |     |  |
| 6. | 2.4  | 7P7Q111A818    | 7P7Q111A819    | 7P7Q111A820    | 7P7Q111A821    | 7P7Q111A822    | 7P7Q111A823    | A-G-A-A-A-U | anti       | anti     | anti     | anti     | anti     | anti     | anti     | anti     | -168  | -158  | -144  | -109  | 102   | -133  | 635 | tSW | n53 | n7BPb | n2BR | n2BR  | sO4'3 |     |      |     |       |     |     |  |
| 7. | 1.3  | 4LGT111BIC2594 | 4LGT111BIC2595 | 4LGT111BIC2596 | 4LGT111BIC2597 | 4LGT111BIC2598 | 4LGT111BIC2599 | C-G-U-G-A-G | anti       | anti     | anti     | anti     | anti     | anti     | anti     | anti     | -167  | -155  | -126  | -136  | 58    | -169  | 635 | cWW | 635 | tSW   | 635  | s55   | s55   | s55 | n0BR | 7BR | sO4'3 |     |     |  |
| 8. | 2.4  | 7P7Q111A8156   | 7P7Q111A8157   | 7P7Q111A8158   | 7P7Q111A8159   | 7P7Q111A8160   | 7P7Q111A8161   | C-G-C-U-A-G | anti       | anti     | anti     | anti     | anti     | anti     | anti     | anti     | -169  | -154  | -138  | -129  | 45    | -175  | 635 | cWW | 635 | tSW   | 635  | s55   | s55   | s55 | n0BR | 7BR | sO4'3 |     |     |  |

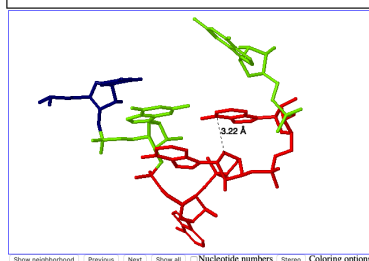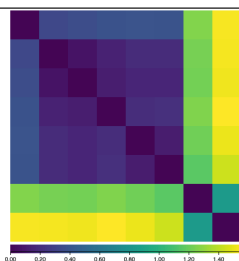

**Figure S4: WebFR3D finds GNNA Z-turns.** (Top) To search r(GNNA) Z-turns, we change the base identity in positions 2 and 5 but otherwise impose the same constraints as in [Figure S3](#). (Bottom) The search retrieves several instances of r(GNNA) sequences that adopt a Z-turn conformation with an ApA Z-step. Besides, it finds a r(GACA) and a r(GUGA) Z-turn. A sO4'3 contact to the (A)C2 atom is visualized by a dashed line. Use the following link to retrieve the results of this search:

<http://rna.bgsu.edu/webfr3d/Results/6280cd2b79770/6280cd2b79770.html>

(last accessed the 6<sup>th</sup> of July 2022)



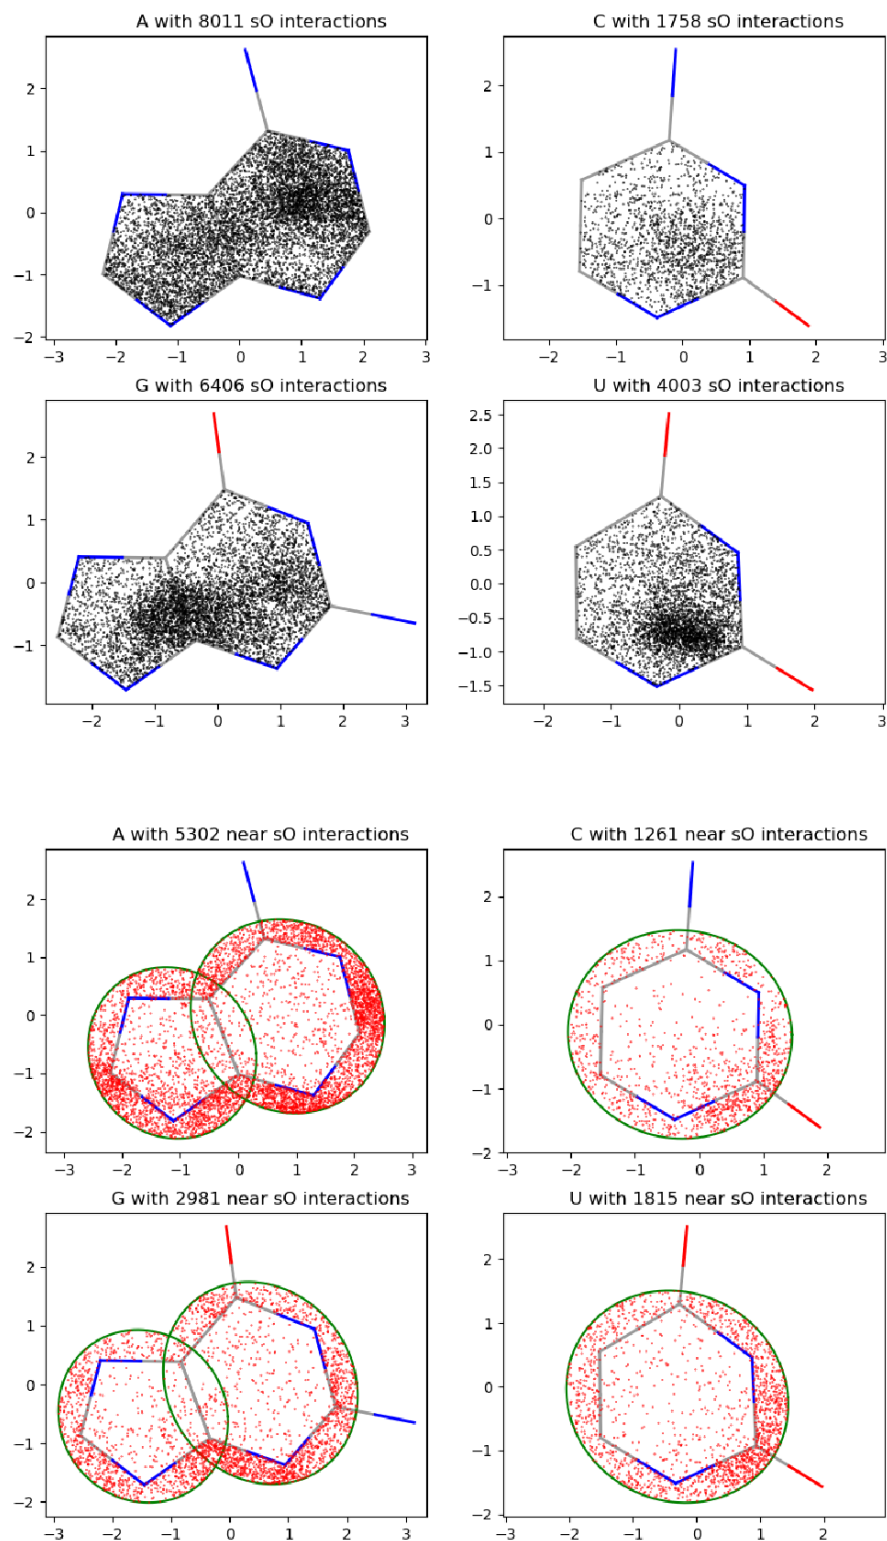

**Figure S6: WebFR3D hits as visualized over the four nucleobases with a sO search at 3.0 Å resolution.** (Top panels) Oxygen locations projected onto the plane of the base, obtained with a sO search as shown in [Figure S1](#) for all four nucleobases from an ensemble of structures with resolution  $\leq 3.0$  Å. (Bottom panels) These panels show the projected oxygen locations in “near” hits obtained with a nsO constraint and explain the working of the “near” keyword.

## References

1. Watson, Z. L.; Ward, F. R.; Meheust, R.; Ad, O.; Schepartz, A.; Banfield, J. F.; Cate, J. H., Structure of the bacterial ribosome at 2 Å resolution. *Elife* **2020**, 9.
2. D'Ascenzo, L.; Leonarski, F.; Vicens, Q.; Auffinger, P., Revisiting GNRA and UNCG folds: U-turns versus Z-turns in RNA hairpin loops. *RNA* **2017**, 23, 259-269.
